# Supplementary material for: Reversible transformation between solid and liquid states of Na2S2O3·5H2O leads to supercapacitor electrolytes with low volatilization and low self-discharge
Source: Royal Society of Chemistry journal article supplement (doi:10.1039/d3nj00134b), 2023-01-01
Supplement: d3nj00134b1.pdf [file d3nj00134b1.pdf]

## Electronic Supplementary Information

### Reversibly Transformation between Solid and Liquid States of $\text{Na}_2\text{S}_2\text{O}_3 \cdot 5\text{H}_2\text{O}$ as Supercapacitor Electrolytes with Low Volatilization and Low Self-Discharge

Xiangfei Min,<sup>a,b</sup> Jingxuan Tan,<sup>a,b</sup> Tailong Dong,<sup>a,b</sup> Yidi Li,<sup>a</sup> Huawei Zhou,<sup>a,\*</sup> Jie Yin,<sup>a,\*</sup> and Xianxi Zhang<sup>a</sup>

<sup>a</sup>School of Chemistry and Chemical Engineering; College of Materials Science and Engineering; Shandong Provincial Key Laboratory/Collaborative Innovation Center of Chemical Energy Storage; Liaocheng University.

<sup>b</sup>Xiangfei Min, Jingxuan Tan and Tailong Dong contributed equally.

\* E-mail: zhouhuaweiopv@163.com; yinjieily@163.com

## Content

|                                                                                                                                                                                                                                                        |   |
|--------------------------------------------------------------------------------------------------------------------------------------------------------------------------------------------------------------------------------------------------------|---|
| 1. Experimental Section.....                                                                                                                                                                                                                           | 2 |
| 1.1 Fabrication of active carbon electrode for symmetrical supercapacitor.....                                                                                                                                                                         | 2 |
| 1.2 Thermal fabrication of supercapacitor based on liquating $\text{Na}_2\text{S}_2\text{O}_3$ in $5\text{H}_2\text{O}$ electrolyte....                                                                                                                | 2 |
| 1.3 Materials characterization.....                                                                                                                                                                                                                    | 3 |
| 1.4 Electrochemical characterization.....                                                                                                                                                                                                              | 3 |
| 2. Results.....                                                                                                                                                                                                                                        | 3 |
| Figure S1: Weight loss based on 2 M $\text{Na}_2\text{S}_2\text{O}_3$ electrolyte, 2 M KOH electrolyte, and liquating $\text{Na}_2\text{S}_2\text{O}_3$ in $5\text{H}_2\text{O}$ at 80 °C for 2 h.....                                                 | 4 |
| Figure S2: Weight loss based on 2 M $\text{Na}_2\text{S}_2\text{O}_3$ electrolytes, 2 M KOH electrolyte, and liquating $\text{Na}_2\text{S}_2\text{O}_3$ in $5\text{H}_2\text{O}$ at 120 °C for 2 h.....                                               | 5 |
| Figure S3: Weight loss based on 2 M $\text{Na}_2\text{S}_2\text{O}_3$ electrolytes, 2 M KOH electrolyte, and liquating $\text{Na}_2\text{S}_2\text{O}_3$ in $5\text{H}_2\text{O}$ at 140 °C for 2 h.....                                               | 5 |
| Figure S4: Weight loss based on 2 M $\text{Na}_2\text{S}_2\text{O}_3$ electrolytes, 2 M KOH electrolyte, and liquating $\text{Na}_2\text{S}_2\text{O}_3$ in $5\text{H}_2\text{O}$ at 160 °C for 2 h.....                                               | 6 |
| Figure S5: Element mapping: (a) Na element of $\text{Na}_2\text{S}_2\text{O}_3$ ; (b) O element of $\text{Na}_2\text{S}_2\text{O}_3$ ; (c) S element $\text{Na}_2\text{S}_2\text{O}_3$ ; (d) hybrid element of $\text{Na}_2\text{S}_2\text{O}_3$ ..... | 6 |
| Figure S6: Element content and EDS of $\text{Na}_2\text{S}_2\text{O}_3$ .....                                                                                                                                                                          | 7 |
| Figure S7: Cyclic stability of supercapacitor with 2 M $\text{Na}_2\text{S}_2\text{O}_3$ electrolyte at 25 °C at a current density of $0.067 \text{ mA} \cdot \text{mg}^{-1}$ .....                                                                    | 7 |
| Figure S8: Cyclic stability of supercapacitor with 2 M KOH electrolyte at 25 °C at a current density of $0.067 \text{ mA} \cdot \text{mg}^{-1}$ .....                                                                                                  | 8 |
| Figure S9: Cyclic stability of supercapacitor with 2 M KOH electrolyte at 65 °C at a current density of $0.067 \text{ mA} \cdot \text{mg}^{-1}$ .....                                                                                                  | 8 |
| Table S1: The first and last columbic efficiency of supercapacitors with 2 M $\text{Na}_2\text{S}_2\text{O}_3$ and liquating $\text{Na}_2\text{S}_2\text{O}_3$ in $5\text{H}_2\text{O}$ electrolyte at 65 °C.....                                      | 8 |
| Table S2: Specific energy, power, and specific capacitance of supercapacitors with different                                                                                                                                                           |   |

## 1. Experimental Section

### 1.1 Fabrication of active carbon electrode for symmetrical supercapacitor

The nickel foam with a 12 mm diameter was the current collecting substrate. The activated carbon slurry is composed of 0.1608 g activated carbon as the active component, 0.0326 g acetylene black as the conductive additive and 0.0218 g polyvinylidene fluoride as a polymer binder, 5 drops of N-methyl pyrrolidone solvent. Before coating the slurry on the nickel foam, the following two tasks are completed: first, a record of the mass of the nickel foam  $m_1$ ; second, mix the slurry by ball milling or grinding. The nickel foam coated with activated carbon slurry was heated at 120 °C for 1 h to remove the solvent. After the nickel foam with activated carbon slurry is cooled to room temperature, the weight was recorded as  $m_2$ . The amount of active carbon is calculated to be about 0.009863 g ( $m_2 - m_1$ ).

### 1.2 Thermal fabrication of supercapacitor based on liquating $\text{Na}_2\text{S}_2\text{O}_3 \cdot 5\text{H}_2\text{O}$ electrolyte

To be able to turn  $\text{Na}_2\text{S}_2\text{O}_3 \cdot 5\text{H}_2\text{O}$  into a liquid state to facilitate the encapsulation of supercapacitors, each process must be kept at  $\sim 65^\circ\text{C}$ . First, the 2032 positive shell loaded with activated carbon electrodes was transferred to a heating plate at 65 °C.  $\text{Na}_2\text{S}_2\text{O}_3 \cdot 5\text{H}_2\text{O}$  was placed in an oven at 65 °C to make it turn to liquid. 2 drops of hot sodium thiosulfate liquid were added to the hot positive shell. The separator with a diameter of 16 mm is laid on the positive electrode to prevent short circuits of the positive and negative electrodes. Then the activated carbon electrode and the negative shell are placed rapidly on the separator in turn. After the supercapacitor encapsulator was heated to a temperature of 65 °C with a high-power dryer, the loose cell based on positive shell/activated carbon/electrolyte/separator/electrolyte/activated carbon/negative shell was immediately transferred to a hot encapsulator and sealed at a pressure of 0.9 MPa.

### 1.3 Materials characterization

Powders XRD pattern were collected using Cu K $\alpha$  radiation ( $\lambda = 1.54 \text{ \AA}$ ) operating at 45 kV and 200 mA equipped with a 2D matrix high-speed detector moving from 5 to 80 degrees with 0.01-degree step (Rigaku Smartlab diffractometer). The morphology of the solid  $\text{Na}_2\text{S}_2\text{O}_3 \cdot 5\text{H}_2\text{O}$  electrolyte was imaged by SEM operating at 10 kV and 43 pA emitter current with a 4.5 mm working distance (Thermo Fisher Scientific FIB-SEM GX4). The element content and element mapping of the solid  $\text{Na}_2\text{S}_2\text{O}_3 \cdot 5\text{H}_2\text{O}$  electrolyte were measured on an energy dispersive spectrometer (EDS, Bruker) equipping on SEM via detecting element X-ray emission intensity excited by electron beam operating at 10 kV and 43 pA.

### 1.4 Electrochemical characterization

The charge-discharge and self-discharge performance of the supercapacitor was recorded on the instrument of Wuhan LAND measurement (CT3001A, Wuhan LAND Electronic Co. Ltd). The charge-discharge conditions were as follows: voltage range of 0–0.5 V and a current density of  $0.067 \text{ mA} \cdot \text{mg}^{-1}$ . The two-electrode cyclic voltammetry (CV) test was recorded on an electrochemical workstation (Jiangsu Donghua Analytical Instrument Co., Ltd, DH7003), active carbon on Ni foam as working electrodes, 2 M  $\text{Na}_2\text{S}_2\text{O}_3$ , 2 M KOH, and liquated  $\text{Na}_2\text{S}_2\text{O}_3$  dissolved in  $5\text{H}_2\text{O}$  as the electrolyte. Test conditions were as follows: voltage range of 0–0.5 V and different scanning speeds ( from  $0.005$  to  $0.05 \text{ V} \cdot \text{s}^{-1}$ ). Electrochemical impedance spectroscopy was collected on an electrochemical workstation (Jiangsu Donghua Analytical Instrument Co., Ltd, DH7003) with a frequency range from  $10^6$  to 0.05 Hz. The electrochemical test at high temperature is carried out by placing the supercapacitor in an oven setting with a target temperature.

## 2. Results

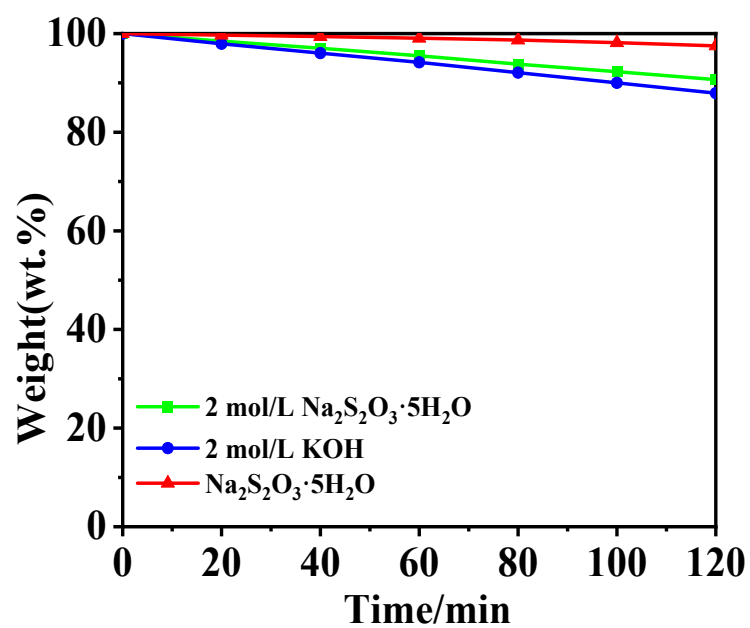

Figure S1: Weight loss based on 2 M Na<sub>2</sub>S<sub>2</sub>O<sub>3</sub> electrolyte, 2 M KOH electrolyte, and liquating Na<sub>2</sub>S<sub>2</sub>O<sub>3</sub> in 5H<sub>2</sub>O at 80 °C for 2 h.

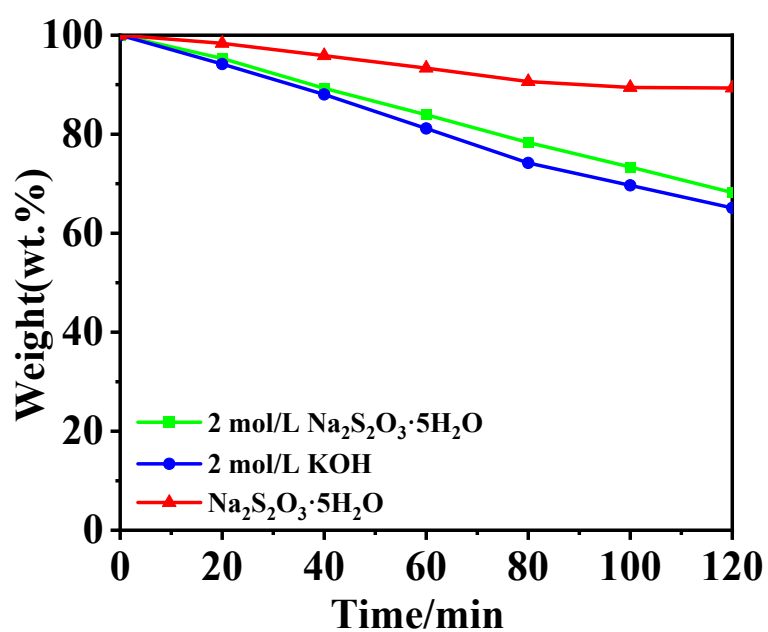

Figure S2: Weight loss based on 2 M  $\text{Na}_2\text{S}_2\text{O}_3$  electrolytes, 2 M KOH electrolyte, and liquating  $\text{Na}_2\text{S}_2\text{O}_3$  in  $5\text{H}_2\text{O}$  at  $120^\circ\text{C}$  for 2 h.

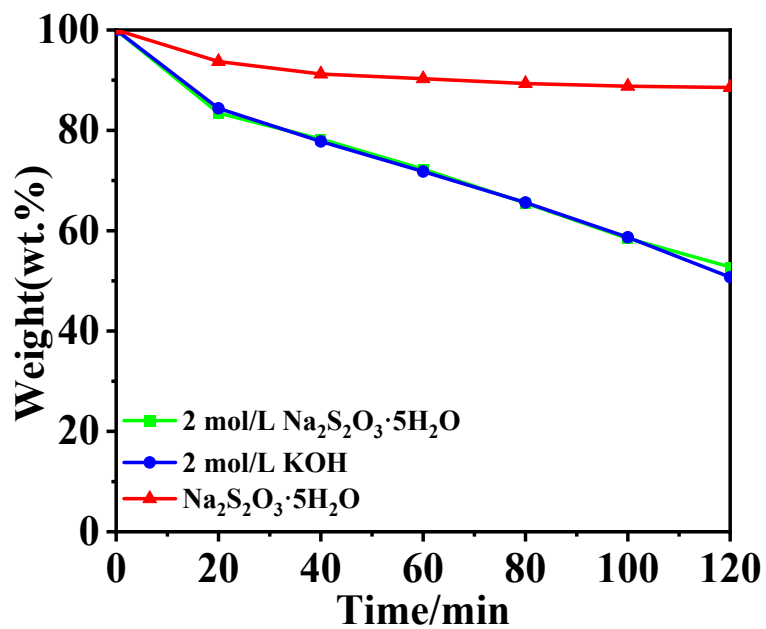

Figure S3: Weight loss based on 2 M  $\text{Na}_2\text{S}_2\text{O}_3$  electrolytes, 2 M KOH electrolyte, and liquating  $\text{Na}_2\text{S}_2\text{O}_3$  in  $5\text{H}_2\text{O}$  at  $140^\circ\text{C}$  for 2 h.

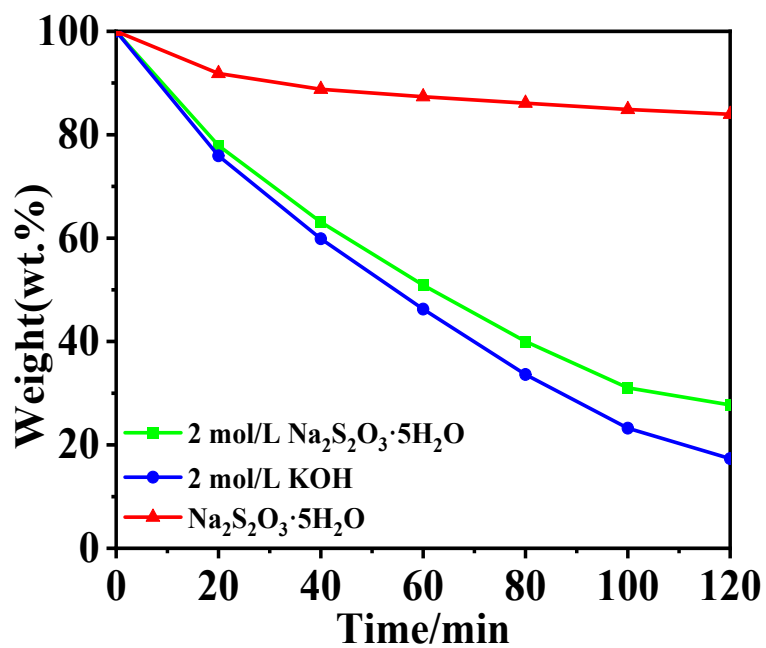

Figure S4: Weight loss based on 2 M  $\text{Na}_2\text{S}_2\text{O}_3$  electrolytes, 2 M KOH electrolyte, and liquating  $\text{Na}_2\text{S}_2\text{O}_3$  in  $5\text{H}_2\text{O}$  at  $160\text{ }^\circ\text{C}$  for 2 h.

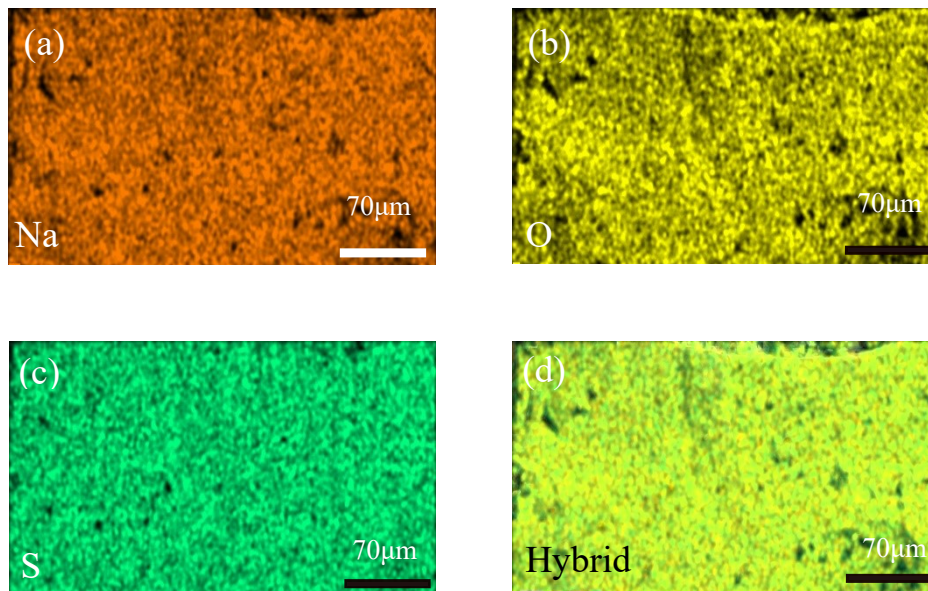

Figure S5: Element mapping: (a) Na element of  $\text{Na}_2\text{S}_2\text{O}_3$ ; (b) O element of  $\text{Na}_2\text{S}_2\text{O}_3$ ; (c) S of element  $\text{Na}_2\text{S}_2\text{O}_3$ ; (d) hybrid element of  $\text{Na}_2\text{S}_2\text{O}_3$ .

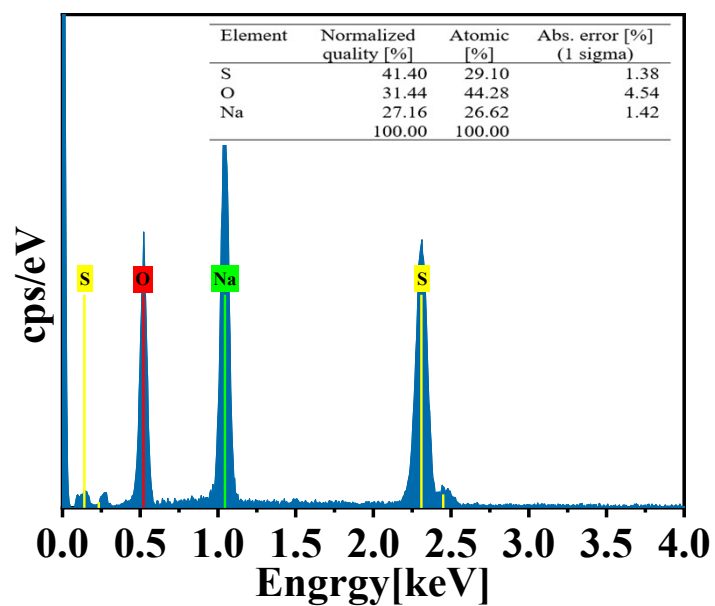

Figure S6: Element content and EDS of Na<sub>2</sub>S<sub>2</sub>O<sub>3</sub>.

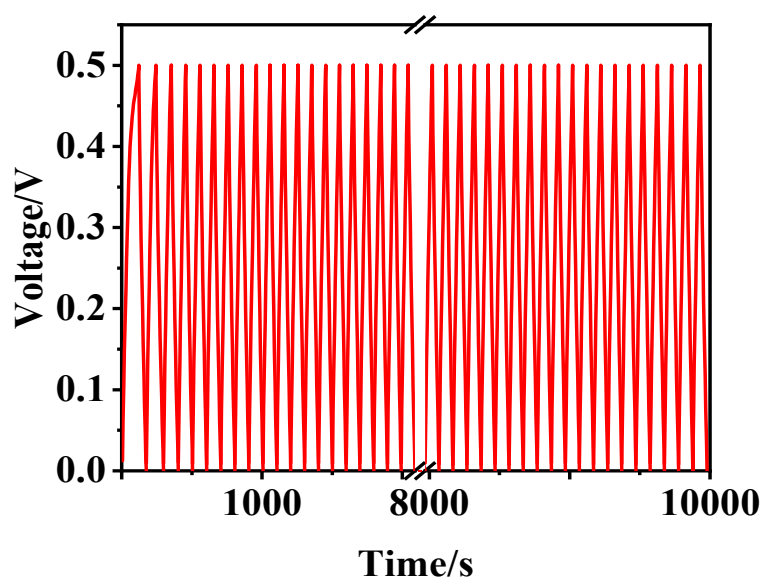

Figure S7: Cyclic stability of supercapacitor with 2 M Na<sub>2</sub>S<sub>2</sub>O<sub>3</sub> electrolyte at 25 °C at a current density of 0.067 mA·mg<sup>-1</sup>.

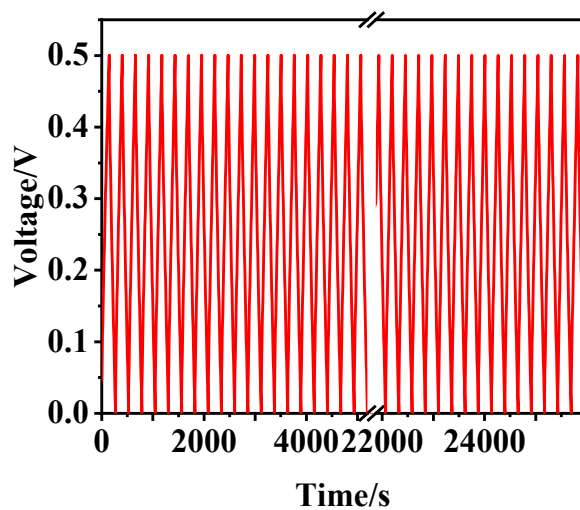

Figure S8: Cyclic stability of supercapacitor with 2 M KOH electrolyte at 25 °C at a current density of 0.067 mA·mg<sup>-1</sup>.

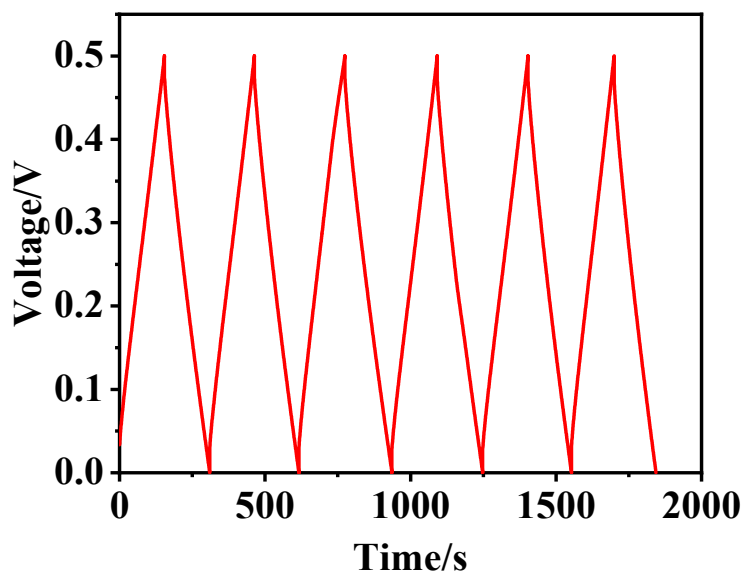

Figure S9: Cyclic stability of supercapacitor with 2 M KOH electrolyte at 65 °C at a current density of 0.067 mA·mg<sup>-1</sup>.

Table S1: The first and last coulombic efficiency of supercapacitors with 2 M Na<sub>2</sub>S<sub>2</sub>O<sub>3</sub> and liquating Na<sub>2</sub>S<sub>2</sub>O<sub>3</sub> in 5H<sub>2</sub>O electrolyte at 65 °C.

| Electrolyte                                                                  | Temperature/°C | Coulombic efficiency% |          |
|------------------------------------------------------------------------------|----------------|-----------------------|----------|
|                                                                              |                | the first             | the last |
| 2 M Na <sub>2</sub> S <sub>2</sub> O <sub>3</sub>                            |                | 89.95                 | 92.91    |
| Na <sub>2</sub> S <sub>2</sub> O <sub>3</sub> dissolved in 5H <sub>2</sub> O | 65             | 81.38                 | 82.41    |



Table S2: Specific energy, power, and specific capacitance of supercapacitors with different electrolytes at 25 and 65 °C.

| Electrolyte                                                                 | Temperature /°C | Specific energy /Wh·kg <sup>-1</sup> | Power /W·kg <sup>-1</sup> | Specific capacitance / mF·cm <sup>-2</sup> |
|-----------------------------------------------------------------------------|-----------------|--------------------------------------|---------------------------|--------------------------------------------|
| 2 M Na <sub>2</sub> S <sub>2</sub> O <sub>3</sub>                           | 25              | 0.14                                 | 10.52                     | 110.40                                     |
|                                                                             | 65              | 0.31                                 | 10.52                     | 246.11                                     |
| 2 M KOH                                                                     | 25              | 0.30                                 | 8.39                      | 299                                        |
|                                                                             | 65              | 0.36                                 | 8.39                      | 359.52                                     |
| Na <sub>2</sub> S <sub>2</sub> O <sub>3</sub> dissolved in H <sub>2</sub> O | 25              | 0.000676                             | 2.43                      | 0.88                                       |
|                                                                             | 65              | 0.50                                 | 10.98                     | 377.21                                     |
